# Supplementary material for: Sequential sequestrations increase the incorporation and retention of multiple growth factors in mineralized collagen scaffolds
Source: Royal Society of Chemistry journal article supplement (doi:10.1039/d0ra03872e), 2020-01-01
Supplement: d0ra03872e1.pdf [file d0ra03872e1.pdf]

## Supporting Information

### **Sequential sequestrations increase the incorporation and retention of multiple growth factors in mineralized collagen scaffolds**

*Aleczandria S. Tiffany, Marley J. Dewey, Brendan A.C. Harley*

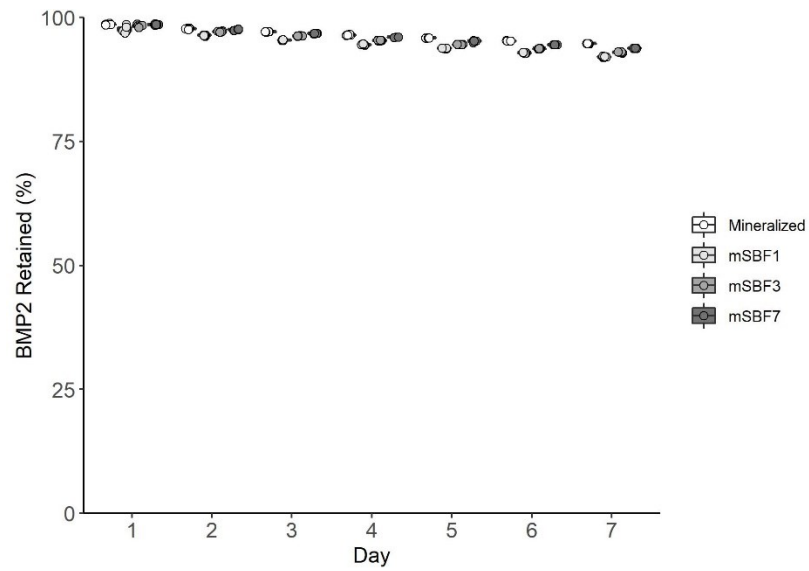

**Supplemental Figure 1: Full BMP2 retention plot for data presented in Figure 1C.** Boxplots overlaid with individual data points are used to represent data. Retention of BMP2 in scaffolds with the y-axis starting at 0%.

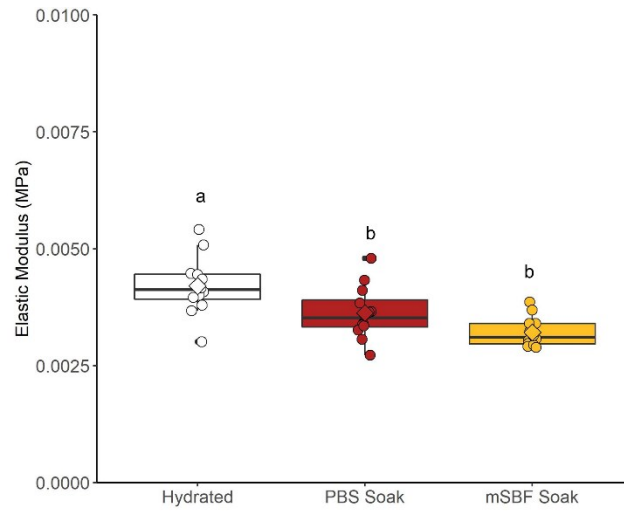

**Supplemental Figure 2: Compression testing of hydrated, mSBF soaked, and PBS soaked scaffolds.** Boxplots overlaid with individual data points are used to represent data. Elastic modulus of treated scaffolds. All scaffolds groups are softer than 5 kPa. Groups that share a letter are not significantly different ( $p < 0.05$ ).

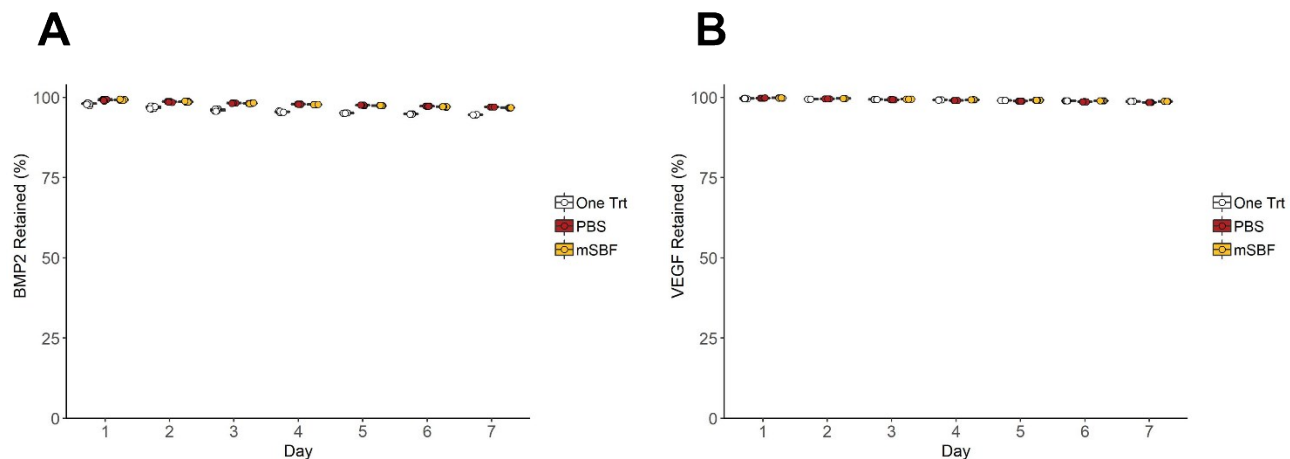

**Supplemental Figure 3: Full retention plots for data presented in Figure 2.** Boxplots overlaid with individual data points are used to represent data. (A) Retention of BMP2 in scaffolds with the y-axis starting at 0%; corresponding to data presented in Figure 2C. (B) Retention of VEGF in scaffolds with the y-axis starting at 0%; corresponding to data presented in Figure 2E.

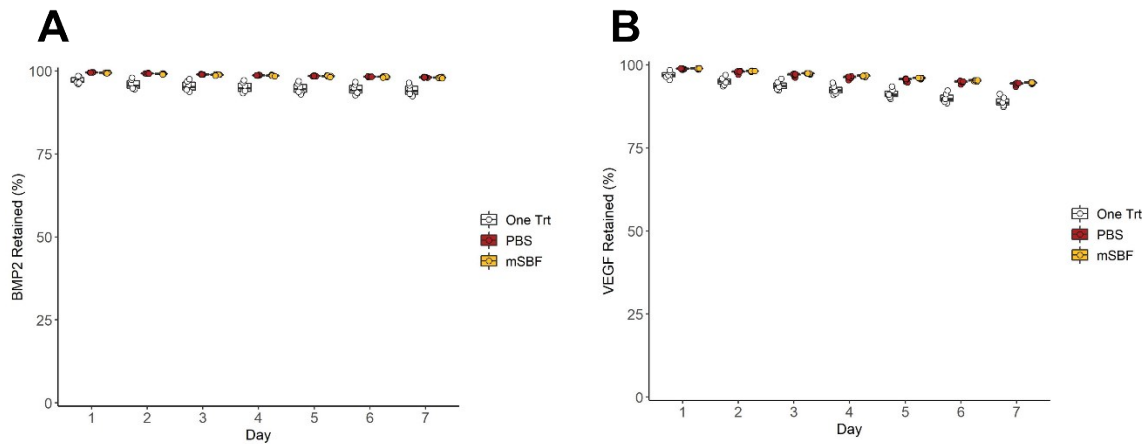

**Supplemental Figure 4: Full retention plots for data presented in Figure 3.** Boxplots overlaid with individual data points are used to represent data. (A) Retention of BMP2 in scaffolds with the y-axis starting at 0%; corresponding to data presented in Figure 3C. (B) Retention of VEGF in scaffolds with the y-axis starting at 0%; corresponding to data presented in Figure 3E.

**Supplemental Table 1.** PCR primers and assay IDs.

| <b>Transcript</b> | <b>Supplier</b>       | <b>Assay ID</b> |
|-------------------|-----------------------|-----------------|
| <i>18S</i>        | ThermoFisher (Taqman) | Hs99999901_s1   |
| <i>PPIA</i>       | ThermoFisher (Taqman) | Hs04194521_s1   |
| <i>PDGF</i>       | ThermoFisher (Taqman) | Hs00966522_m1   |
| <i>HIF1a</i>      | ThermoFisher (Taqman) | Hs00153153_m1   |
| <i>ANG1</i>       | ThermoFisher (Taqman) | Hs00919202_m1   |
| <i>ANG2</i>       | ThermoFisher (Taqman) | Hs00169867_m1   |

**Supplemental Table 2.** Summary statistics for PDGF and HIF1a PCR data

| Day | Group   | Platelet Derived Growth Factor |             | Hypoxia Inducible Factor 1 $\alpha$ |             |
|-----|---------|--------------------------------|-------------|-------------------------------------|-------------|
|     |         | Fold Change*                   | Sample Size | Fold Change*                        | Sample Size |
| 1   | Blank   | 1.310 $\pm$ 2.086              | 7           | 3.565 $\pm$ 4.796                   | 7           |
| 1   | mSBF    | 1.246 $\pm$ 0.902              | 8           | 1.902 $\pm$ 0.696                   | 8           |
| 1   | One Trt | 2.191 $\pm$ 0.921              | 7           | 2.208 $\pm$ 0.845                   | 8           |
| 1   | Soluble | 0.440 $\pm$ 0.199              | 8           | 1.363 $\pm$ 0.417                   | 8           |
| 4   | Blank   | 2.461 $\pm$ 1.381              | 7           | 3.645 $\pm$ 3.468                   | 8           |
| 4   | mSBF    | 3.592 $\pm$ 2.005              | 7           | 1.248 $\pm$ 0.379                   | 8           |
| 4   | One Trt | 18.95 $\pm$ 28.48              | 4           | 10.76 $\pm$ 9.932                   | 8           |
| 4   | Soluble | 4.430 $\pm$ 3.353              | 8           | 2.226 $\pm$ 1.506                   | 8           |
| 7   | Blank   | 2.123 $\pm$ 2.003              | 8           | 3.014 $\pm$ 5.937                   | 8           |
| 7   | mSBF    | 1.624 $\pm$ 0.654              | 6           | 0.647 $\pm$ 0.126                   | 8           |
| 7   | One Trt | 3.619 $\pm$ 1.184              | 5           | 1.916 $\pm$ 1.561                   | 8           |
| 7   | Soluble | 2.514 $\pm$ 1.543              | 6           | 1.249 $\pm$ 1.669                   | 8           |

\*mean  $\pm$  standard deviation.

**Supplemental Table 3.** Summary statistics for ANG1 and ANG2 PCR data

| Day | Group   | Angiopoietin 1 |             | Angiopoietin 2 |             |
|-----|---------|----------------|-------------|----------------|-------------|
|     |         | Fold Change*   | Sample Size | Fold Change*   | Sample Size |
| 1   | Blank   | 5.360 ± 5.702  | 7           | 1.104 ± 1.462  | 7           |
| 1   | mSBF    | 4.176 ± 1.991  | 8           | 0.737 ± 0.290  | 8           |
| 1   | One Trt | 2.182 ± 1.427  | 4           | 0.455 ± 0.186  | 8           |
| 1   | Soluble | 5.309 ± 4.315  | 8           | 0.302 ± 0.086  | 8           |
| 4   | Blank   | 2.508 ± 2.410  | 7           | 2.742 ± 2.994  | 8           |
| 4   | mSBF    | 2.030 ± 0.550  | 7           | 3.865 ± 7.248  | 8           |
| 4   | One Trt | 4.324 ± 3.557  | 3           | 15.12 ± 12.86  | 8           |
| 4   | Soluble | 2.126 ± 1.365  | 7           | 1.251 ± 0.656  | 8           |
| 7   | Blank   | 1.035 ± 0.335  | 6           | 6.024 ± 12.18  | 8           |
| 7   | mSBF    | 1.495 ± 0.447  | 8           | 0.936 ± 0.286  | 8           |
| 7   | One Trt | 2.335 ± 1.438  | 4           | 4.058 ± 6.275  | 8           |
| 7   | Soluble | 1.718 ± 1.195  | 6           | 1.666 ± 1.115  | 7           |

\*mean ± standard deviation.
